# Supplementary material for: Mutations in PIH1D3 Cause X-Linked Primary Ciliary Dyskinesia with Outer and Inner Dynein Arm Defects
Source: PubMed Central journal article supplement — Am J Hum Genet. 2016 Dec 29;100(1):160–8. doi: 10.1016/j.ajhg.2016.11.019 (PMC5223094; doi:10.1016/j.ajhg.2016.11.019), 2016-12-29
Supplement: mmc1.pdf [file mmc1.pdf]

**Supplemental Data**

**Mutations in *PIH1D3* Cause X-Linked**

**Primary Ciliary Dyskinesia**

**with Outer and Inner Dynein Arm Defects**

**Tamara Paff, Niki T. Loges, Isabella Aprea, Kaman Wu, Zeineb Bakey, Eric G. Haarman, Johannes M.A. Daniels, Erik A. Sistermans, Natalija Bogunovic, Gerard W. Dougherty, Inga M. Höben, Jörg Große-Onnebrink, Anja Matter, Heike Olbrich, Claudius Werner, Gerard Pals, Miriam Schmidts, Heymut Omran, and Dimitra Micha**

**A**

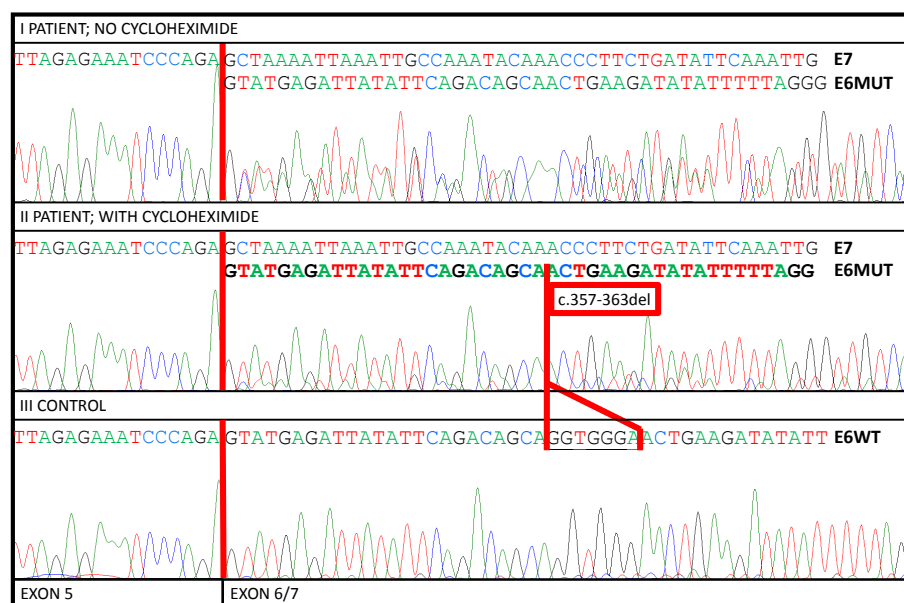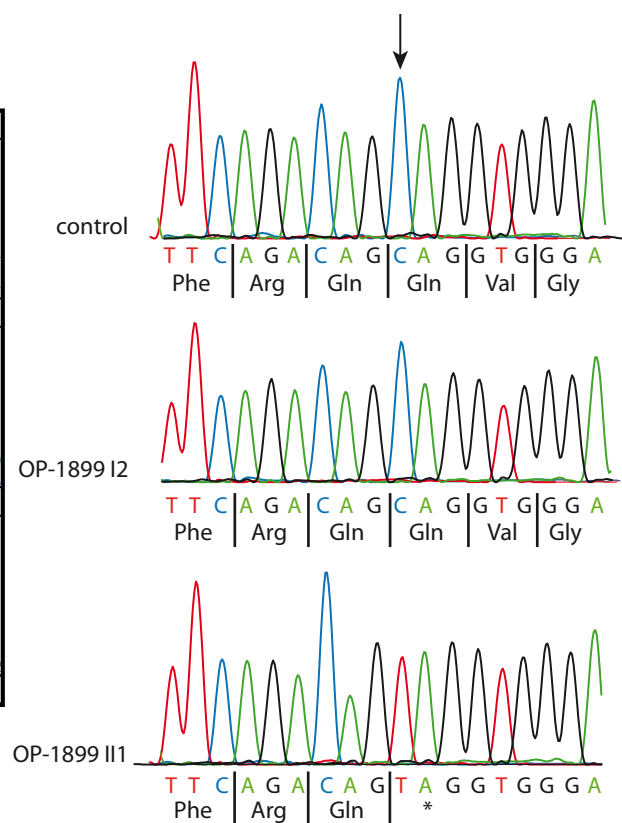

**B**

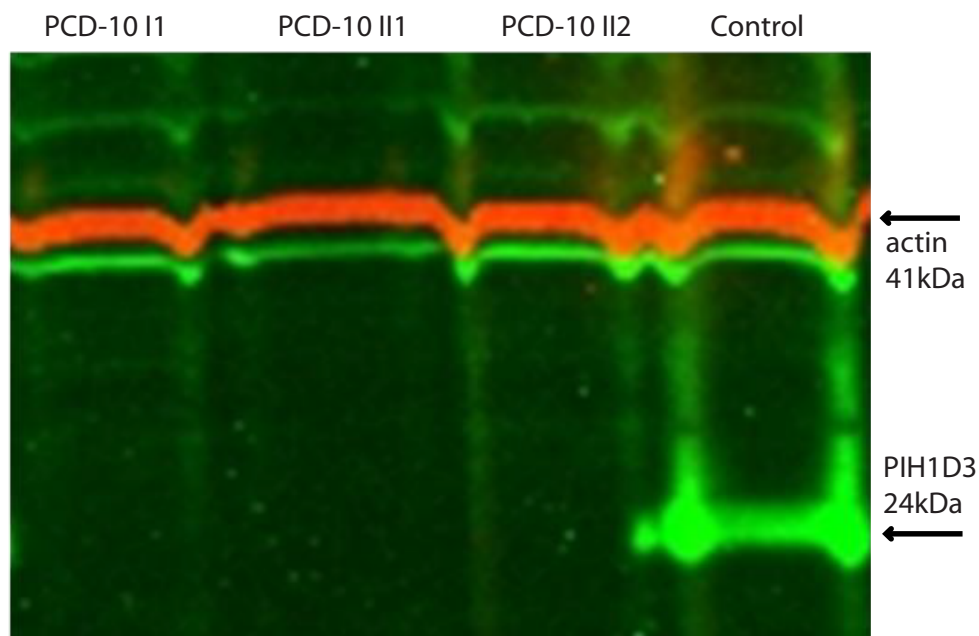

**Figure S1. Results of the mutational analyses in *PIH1D3* and expression of *PIH1D3* in respiratory cells.**

(A) cDNA sequences of transcripts from cultured respiratory cells of a patient from family PCD-10, with the c.357\_363del variant in *PIH1D3* (I), showing two aberrant transcripts: one transcript with the 7 base deletion in exon 6 (E6MUT) and one that shows exon skipping of exon 6 (E7). The cells were cultured with cycloheximide, which blocks the translation step in protein synthesis and consequently inhibits nonsense mediated decay (NMD) (II). This sample shows mainly the E6MUT transcript, indicating that the E6MUT transcript is produced predominantly, but is more subject to NMD in sample A than the exon skipping transcript. In respiratory cells of healthy controls only the wild type (E6WT) transcript is found (III). In family OP-1899 the hemizygous nonsense mutation within exon 6 of *PIH1D3* results in a premature stop codon. (B) The expression of *PIH1D3* was analyzed by immunoblotting in whole cell lysates of nasal brush biopsies of three patients (PCD-10 I1, PCD-10 II1 and PCD-10 II2) with the c.357\_363del variant and one healthy control. Actin was used to normalize the amount of protein per well.

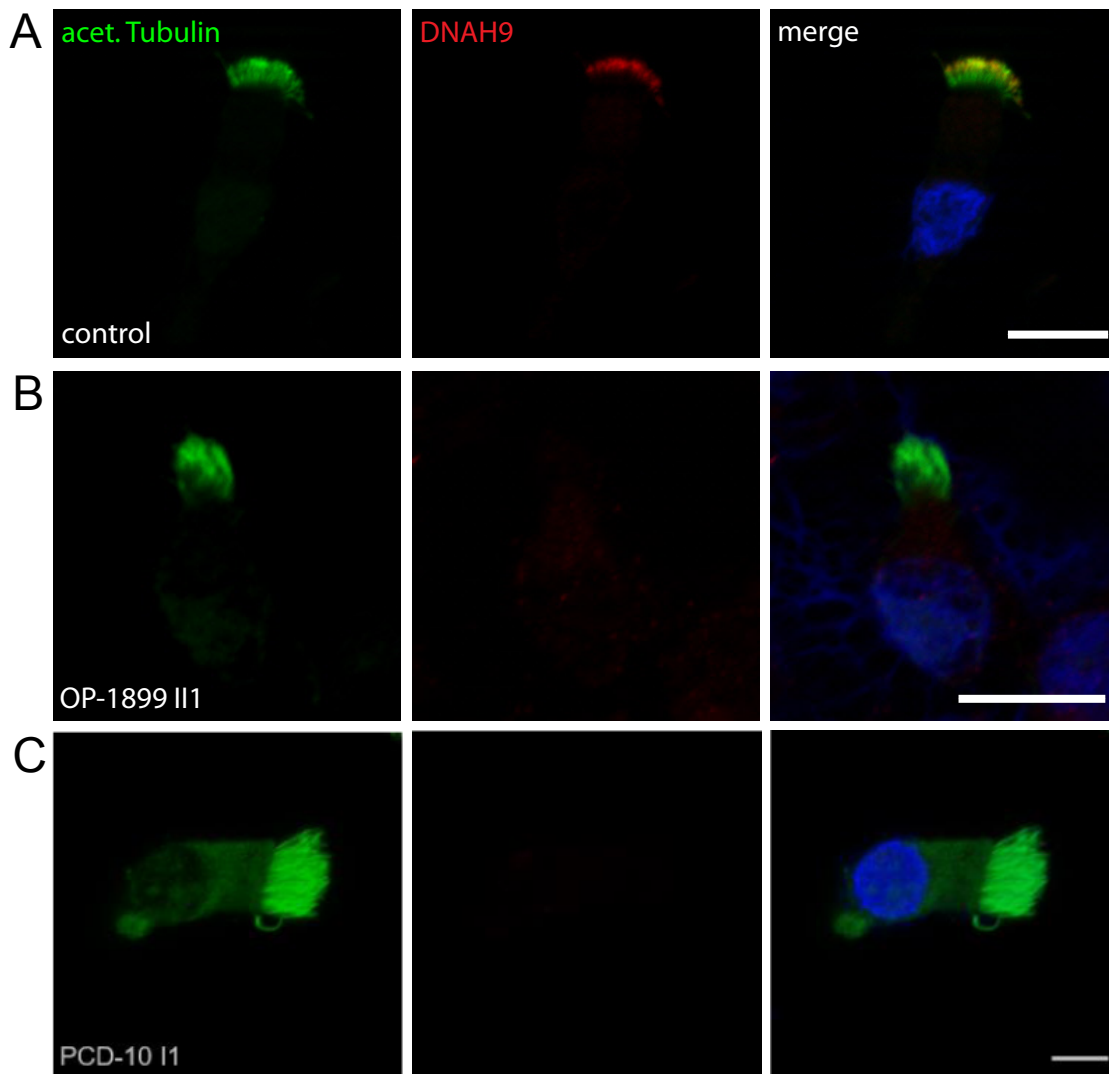

**Figure S2. Loss-of-function *PIH1D3*-mutations result in absence of the outer dynein arm heavy chain DNAH9.**

(A) Respiratory epithelial cells from control and PCD individuals OP-1899 II1 (B) and PCD-10 I1 (C) were double-labeled with antibodies directed against DNAH9 (red) and acetylated tubulin (green). Acetylated tubulin localizes to the entire length of the cilia, whereas DNAH9 localization is restricted to the distal part of the cilia in control cells (A). In contrast, in *PIH1D3*-mutant cells, DNAH9 was absent or severely reduced from ciliary axonemes (B-C). Nuclei were stained with Hoechst33342 or DAPI (blue). Scale bars represent 10µm.

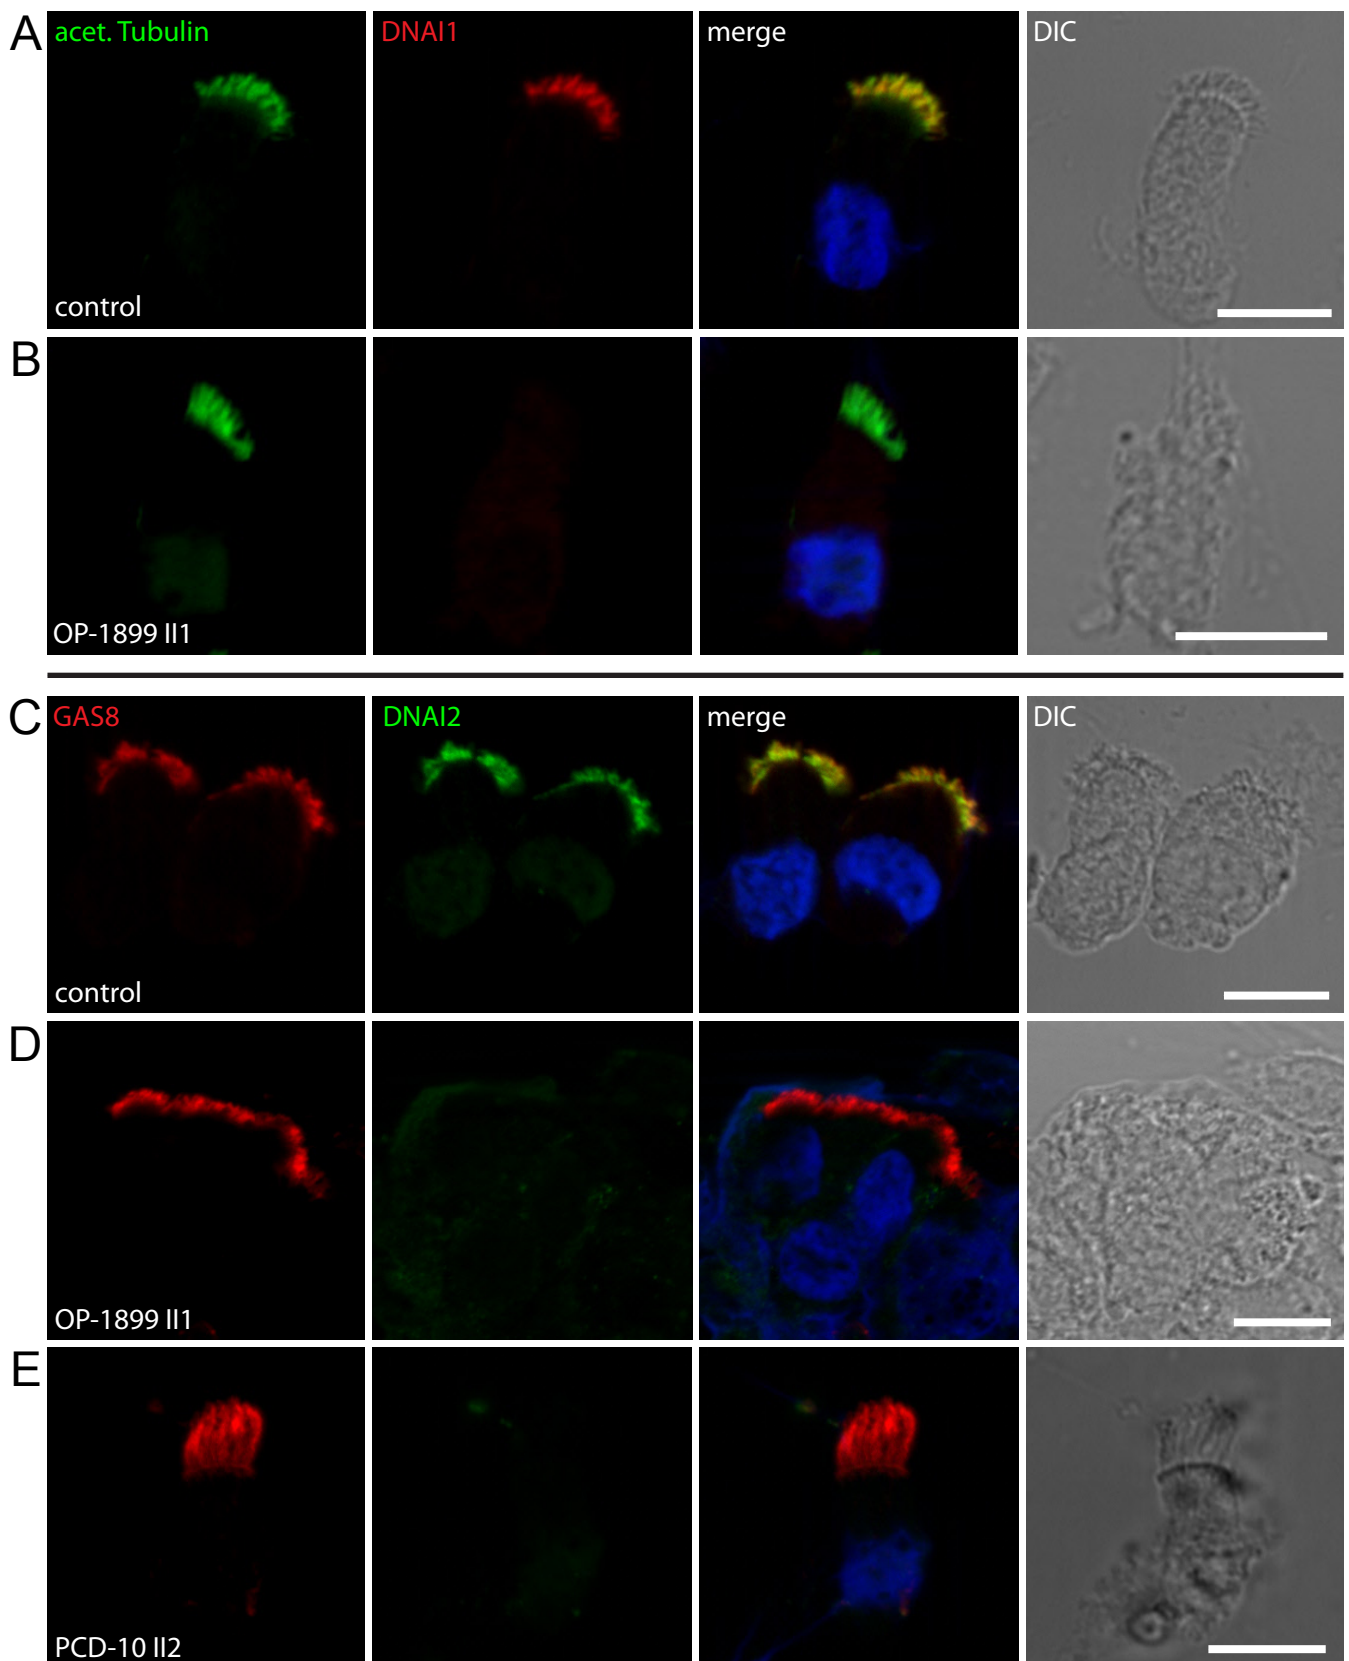

**Figure S3. *PIH1D3*-mutant respiratory cilia are deficient for the outer dynein arm intermediate chains DNAI1 and DNAI2.**

Cells were double-labeled with antibodies directed against acetylated tubulin (green) and DNAI1 (red). Both proteins colocalize along the cilia in cells from the unaffected control (yellow) (A). In contrast, in cells of *PIH1D3*-mutant individuals DNAI1 was absent from or severely reduced in the ciliary axonemes (B). (C-D) Axonemal localization of the ODA intermediate chain DNAI2. Cells were double-labeled with antibodies directed against DNAI2 (green) and GAS8 (red). Both proteins colocalize along the cilia in cells from the unaffected control (yellow) (C). In *PIH1D3*-mutant respiratory cilia, DNAI2 was absent from or severely reduced in the ciliary axonemes, whereas GAS8 showed a normal distribution pattern (D-E). Nuclei were stained with Hoechst33342 (blue). Scale bars represent 10 μm.

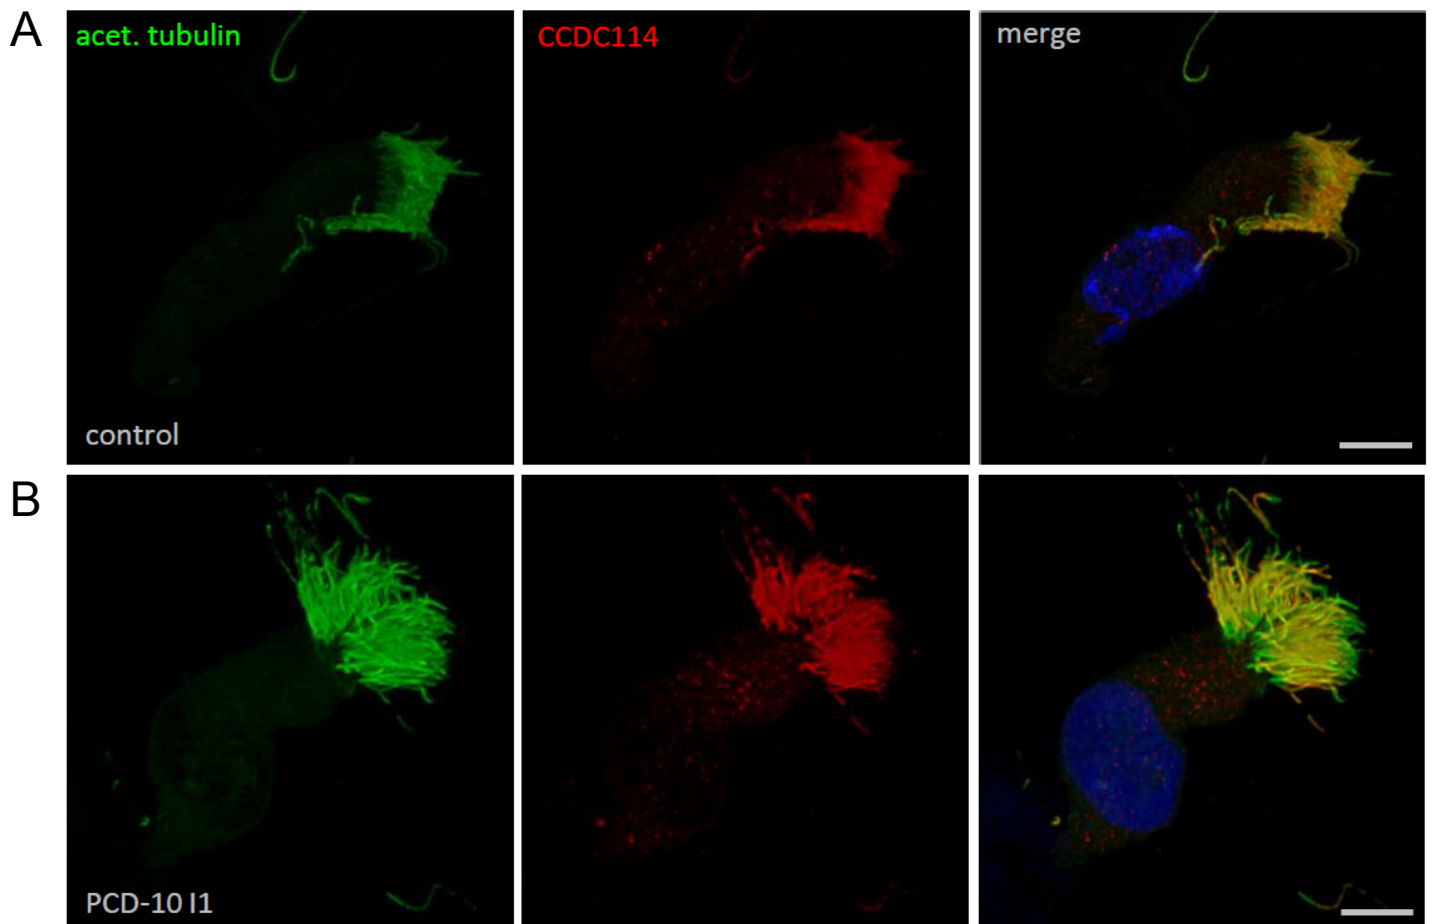

**Figure S4. The outer dynein arm docking complex (ODA-DC) is not affected in *PIH1D3*-mutant cells.** Respiratory cilia were double-labeled with antibodies directed against acetylated tubulin (green) and CCDC114 (red). CCDC114 colocalize with acetylated tubulin along the cilia from unaffected controls (**A**) and in *PIH1D3*-mutant axonemes (**B**) (yellow), indicating that the ODA-DC is not affected by loss of function of *PIH1D3*. Nuclei were stained with Hoechst33342 (blue). Scale bars represent 10  $\mu\text{m}$ .

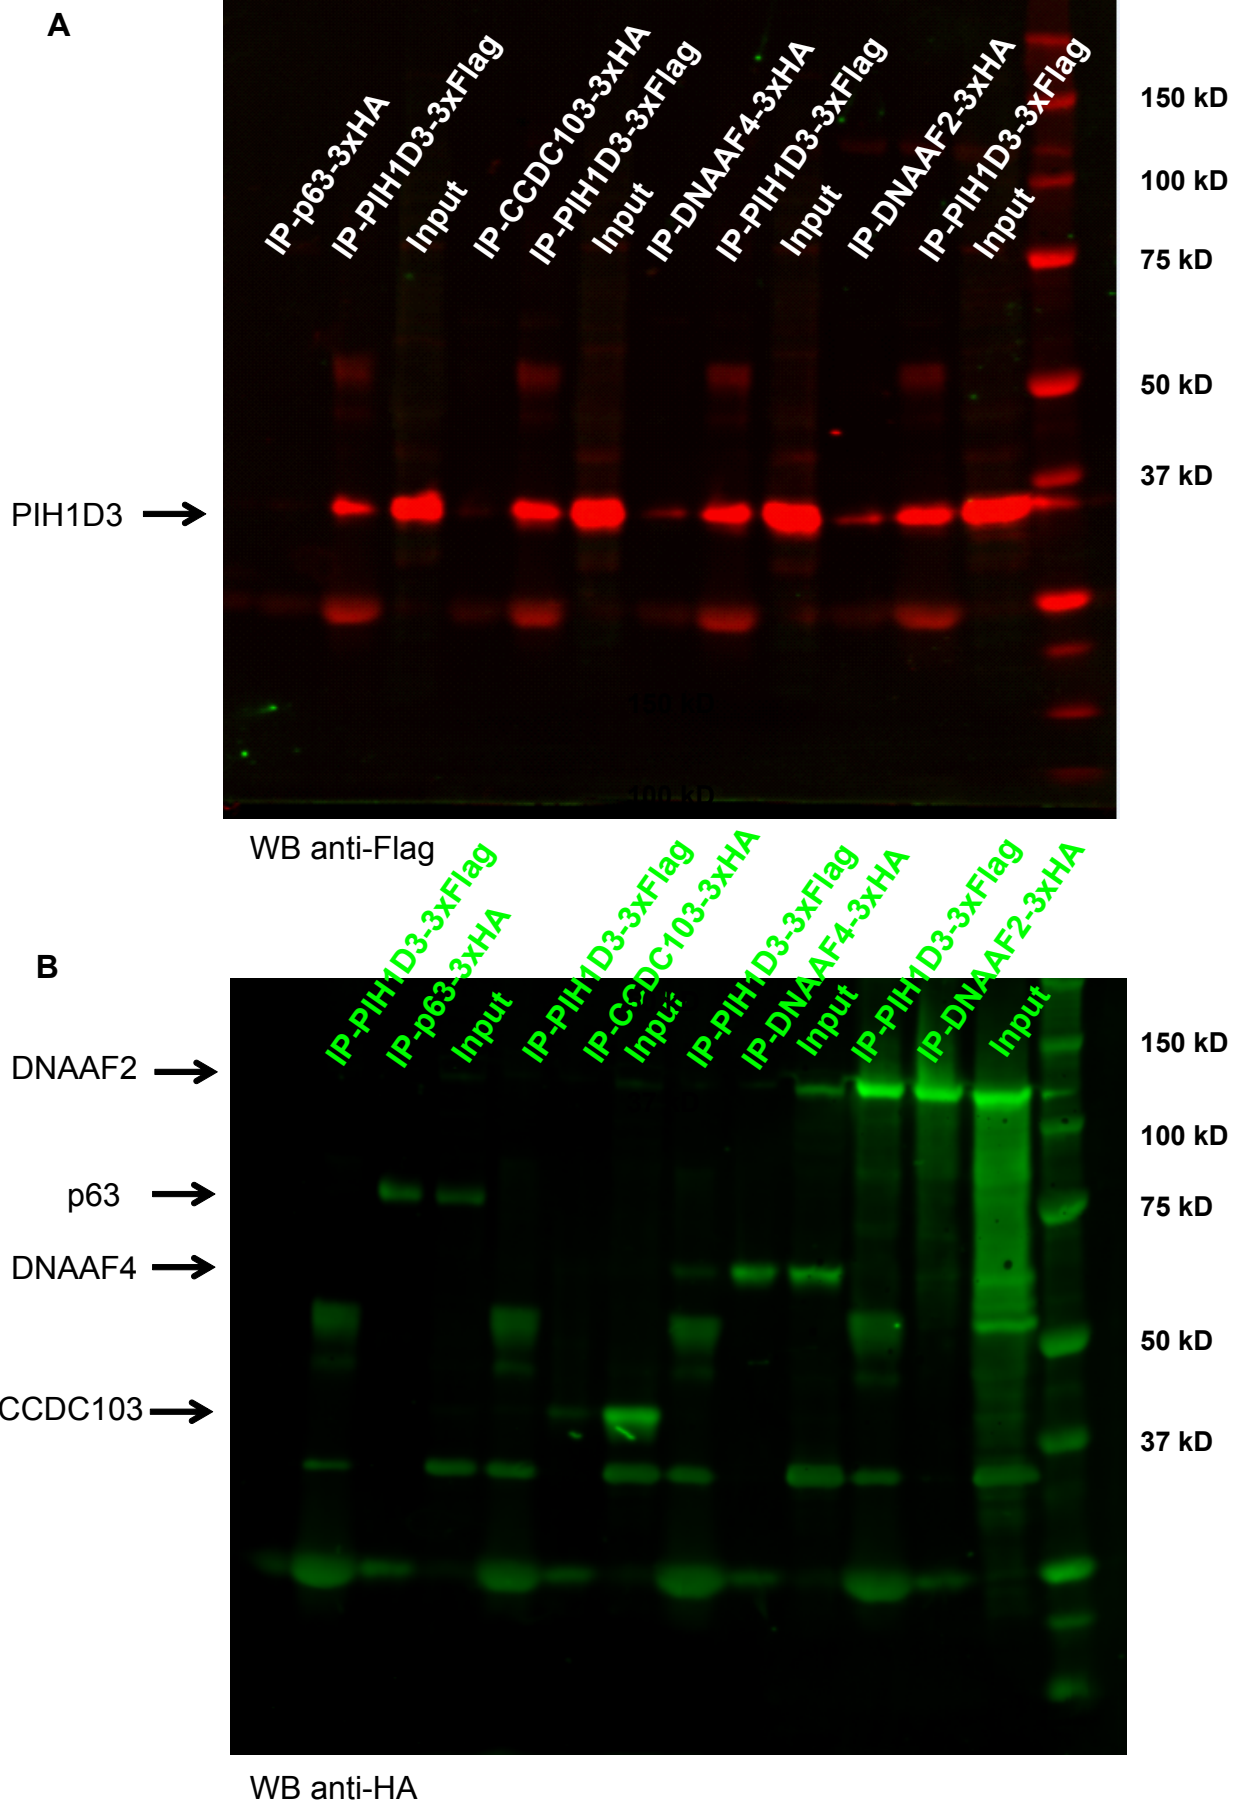

**Figure S5.** Full gel images of the co-immunoprecipitation results shown in Figure 4. (A) Western-Blot anti-Flag. (B) Western Blot anti HA.

**Table S1.** Relative mRNA expression of *PIH1D3* compared to household gene VCP in c.357\_363del mutant cells.

|                       | Relative mRNA expression of <i>PIH1D3</i> (SD) | Percentage |
|-----------------------|------------------------------------------------|------------|
| With cycloheximide    | 0.317 (0.026)                                  | 100%       |
| Without cycloheximide | 0.076 (0.005)                                  | 24%        |

**Table S2.** Antibodies and dyes

| <b>Antibody</b>                                      | <b>Catalogue number</b> | <b>Company</b>     |
|------------------------------------------------------|-------------------------|--------------------|
| Rabbit polyclonal anti-PIH1D3                        | ab151121                | Abcam              |
| Mouse monoclonal anti-Actin                          | ab14128                 | Abcam              |
| IRDye 800 CW goat anti-rabbit IgG                    | P/N 925-68071           | LI-COR Biosciences |
| IRDye 800 CW goat anti-rabbit IgG                    | 926-32211               | LI-COR Biosciences |
| IRDye 680 CW goat anti-mouse IgG                     | P/N 925-68070           | LI-COR Biosciences |
| IRDye 680 CW goat anti-mouse IgG                     | 926-32220               | LI-COR Biosciences |
| Mouse monoclonal anti- acetylated tubulin            | T7451                   | Sigma              |
| Rabbit polyclonal anti-CCDC114                       | HPA042524               | Atlas antibodies   |
| Mouse monoclonal to DNAI2                            | H00064446-M01           | Abnova             |
| Rabbit polyclonal anti-DNAI1                         | HPA021649               | Atlas antibodies   |
| Rabbit polyclonal anti-DNAI2                         | HPA050565               | Atlas antibodies   |
| Rabbit polyclonal anti-DNAH9                         | HPA052641               | Atlas Antibodies   |
| Rabbit polyclonal anti-GAS8                          | HPA041311               | Atlas antibodies   |
| Alexa Fluor 546-conjugated goat antibodies to rabbit | A11035                  | Life technologies  |
| Alexa Fluor 488-conjugated goat antibodies to mouse  | A11029                  | Life technologies  |
| mouse anti-FLAG                                      | clone M2 F9291)         | Sigma              |
| mouse anti-HA                                        | H9658                   | Sigma              |
| Hoechst33342                                         | 14533                   | Sigma              |
| DAPI                                                 | D8417                   | Sigma Aldrich      |
|                                                      |                         |                    |
| Mouse monoclonal anti-DNAH5                          |                         | Omran et al, 2008  |
| Rabbit polyclonal anti-DNALI1                        |                         | Rashid et al, 2006 |



**Table S3.** Genes tested for interaction with *PIH1D3*.

| <b>Gene tested</b>   | <b>Interaction with <i>PIH1D3</i></b> |
|----------------------|---------------------------------------|
| <i>CCDC103</i>       | -                                     |
| <i>CCDC114</i>       | -                                     |
| <i>CCDC151</i>       | -                                     |
| <i>C21orf59</i>      | -                                     |
| <i>DNAAF1</i>        | -                                     |
| <b><i>DNAAF2</i></b> | <b>+</b>                              |
| <i>DNAAF3</i>        | -                                     |
| <b><i>DNAAF4</i></b> | <b>+</b>                              |
| <i>DNAH11</i>        | -                                     |
| <i>DNAI1</i>         | -                                     |
| <i>DNALI1</i>        | -                                     |
| <b><i>HSP90</i></b>  | <b>+</b>                              |
| <i>IFT46</i>         | -                                     |
| <i>LRRC6</i>         | -                                     |
| <i>TTC25</i>         | -                                     |
| <i>TXNDC3</i>        | -                                     |
| <i>WDR69</i>         | -                                     |
| <i>ZMYND10</i>       | -                                     |

+: interaction observed, -: no interaction observed

### Supplemental References

Omran, H. et al. (2008). Ktu/PF13 is required for cytoplasmic pre-assembly of axonemal dyneins. *Nature* 456, 611–616.

Rashid, S. et al. (2006). The murine *Dnali1* gene encodes a flagellar protein that interacts with the cytoplasmic dynein heavy chain 1. *Mol. Reprod. Dev.* 73, 784–794.
